# Supplementary material for: Cognitive and motor abilities predict auditory-cued finger tapping in a dual task
Source: Frontiers journal article supplement (doi:10.3389/fnins.2025.1553548), 2025-05-21
Supplement: Data_Sheet_1.pdf [file Data_Sheet_1.pdf]

(A)

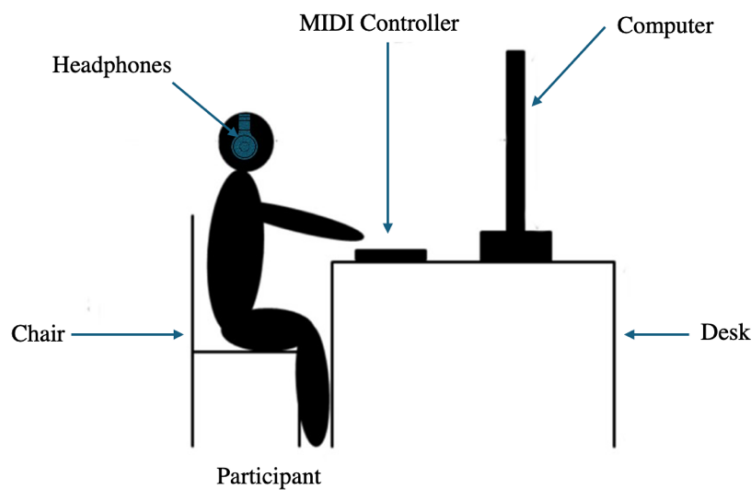

(B)

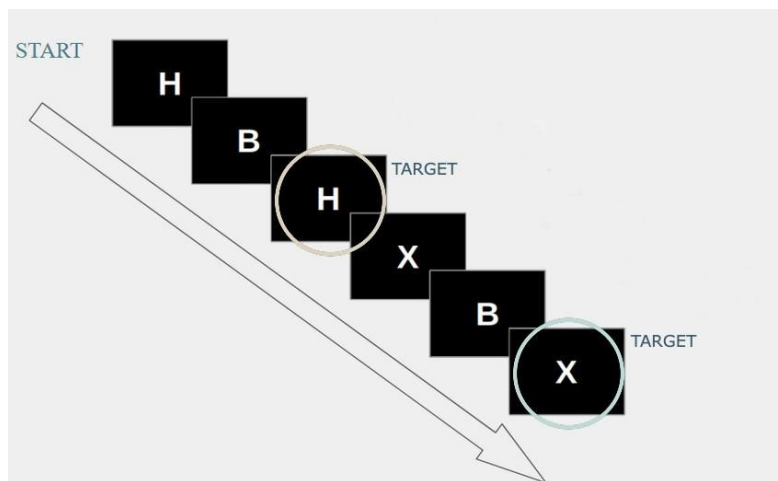

**Supplementary Figure A1.** The participant is required to sit at a desk with comfortable access to MIDI Controller in clear view of the computer screen (A); An example of the 2 back task in which participants must identify if the current item in a sequence matches the one presented two steps earlier (B).

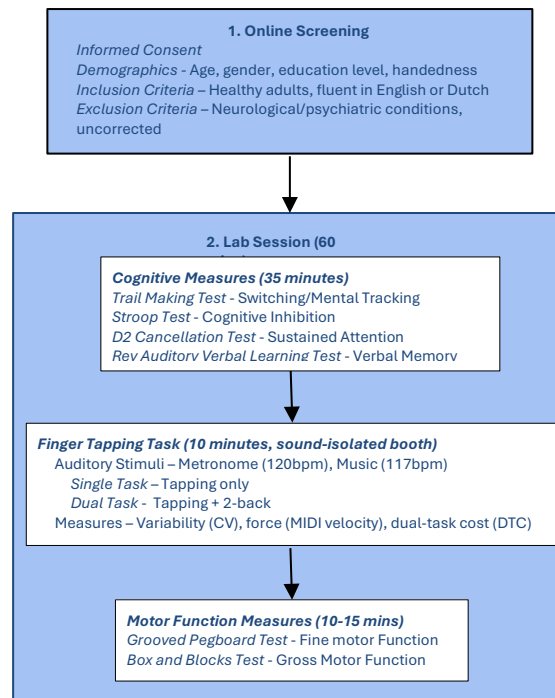

**Supplementary Figure A2.** The study procedure including online screening, and order of administration during the research visit is depicted.
