# Supplementary material for: Cognitive and motor abilities predict auditory-cued finger tapping in a dual task
Source: Frontiers journal article supplement (doi:10.3389/fnins.2025.1553548), 2025-05-21
Supplement: Data_Sheet_5.pdf [file Data_Sheet_5.pdf]

## Supplementary Material E

### Residual Plots of Main Analyses

#### Cognitive Predictors of Tapping Force for the Single Task

**Figure E1.** Q-Q Plot of Residuals of the model with cognitive predictors and tapping force for the single task.

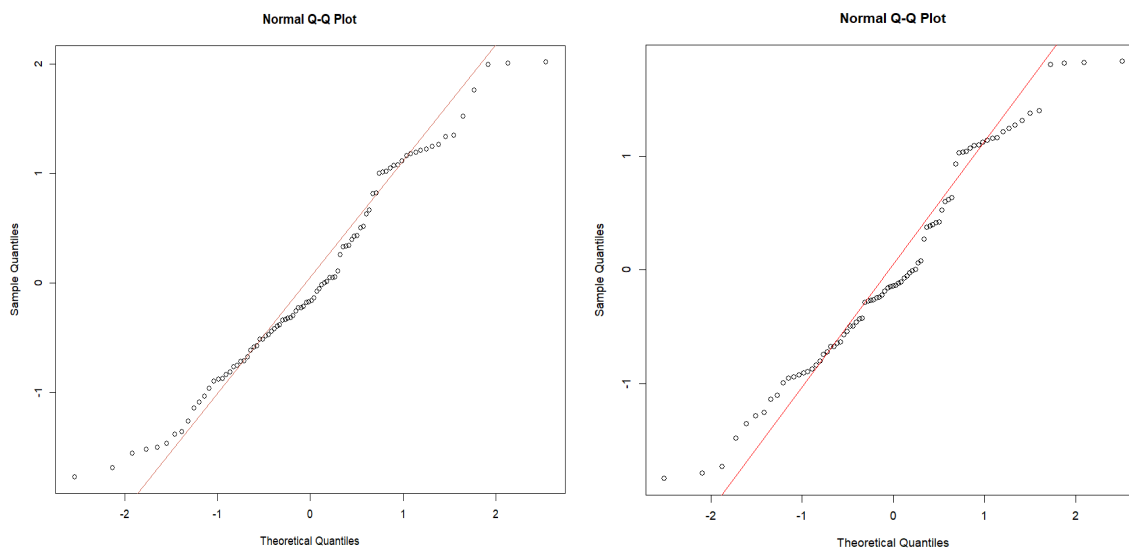

*Note.* QQ-plot of residuals from the model of single task tapping force with cognitive predictors including extreme residuals (left), and with extreme residuals removed (right).

#### Cognitive Predictors of Tapping Consistency for the Single Task

**Figure E2.** Q-Q Plot of Residuals of the model with cognitive predictors of tapping consistency for the single task.

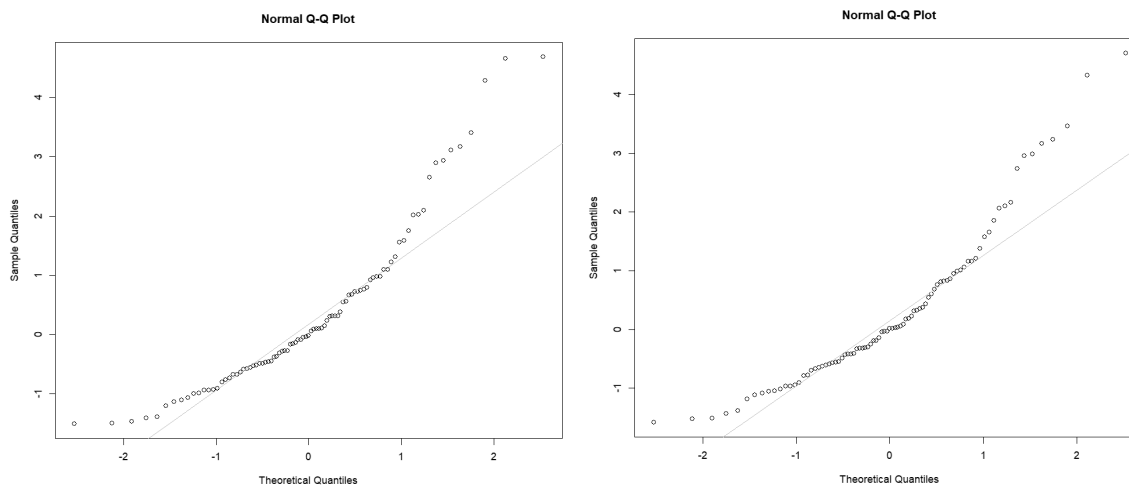

*Note.* QQ-plot of residuals from the model of single task tapping consistency with cognitive predictors, including extreme residuals (left), and with extreme residuals removed (right).

## Motor Predictors of Tapping Force for the Single Task

**Figure E3.** Q-Q Plot of Residuals of the model with motor predictors of tapping force for the single task.

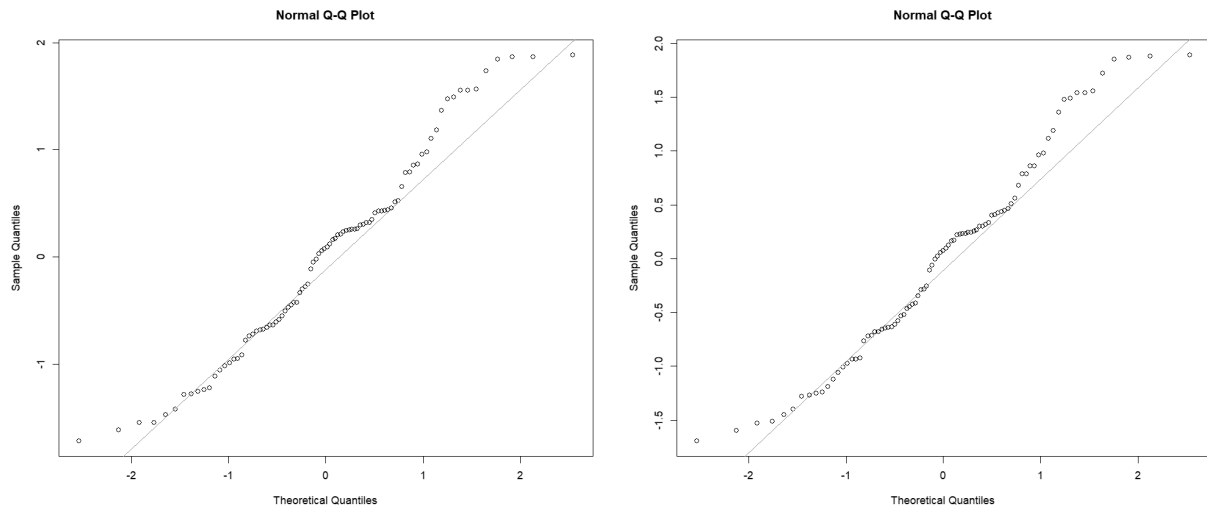

*Note.* QQ-plot of residuals from the model of single task tapping force with motor predictors, including extreme residuals (left), and with extreme residuals removed (right).

## Motor Predictors of Tapping Consistency for the Single Task

**Figure E4.** Q-Q Plot of Residuals of the model with motor predictors of tapping consistency for the single task.

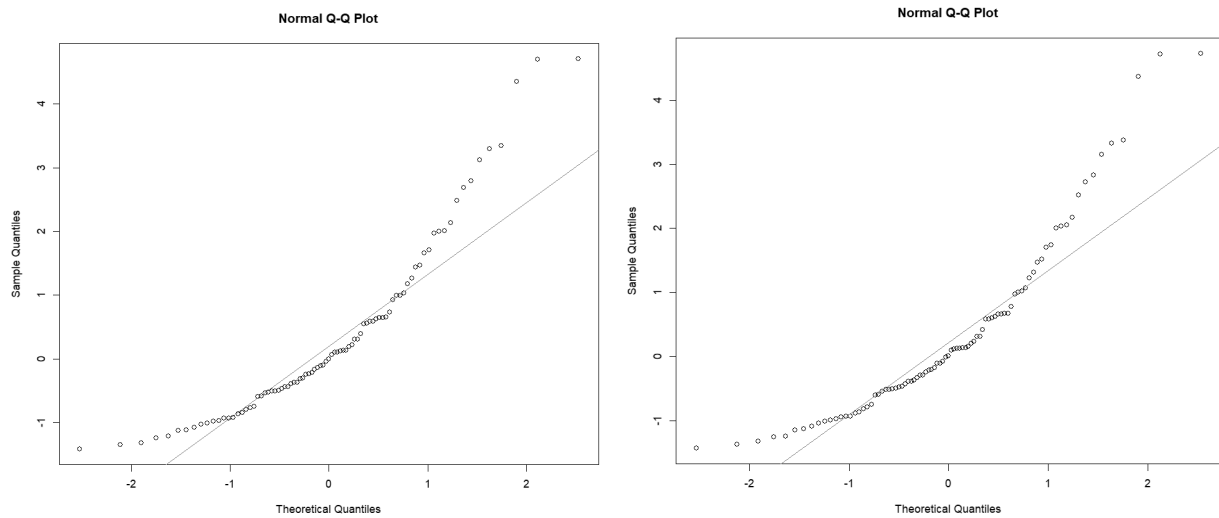

*Note.* QQ-plot of residuals from the model of single task tapping consistency with motor predictors, including extreme residuals (left), and with extreme residuals removed (right).

## Cognitive Predictors of Tapping Force for the Dual Task Cost

**Figure E5.** Q-Q Plot of Residuals of the model with cognitive predictors of tapping force for the dual task cost.

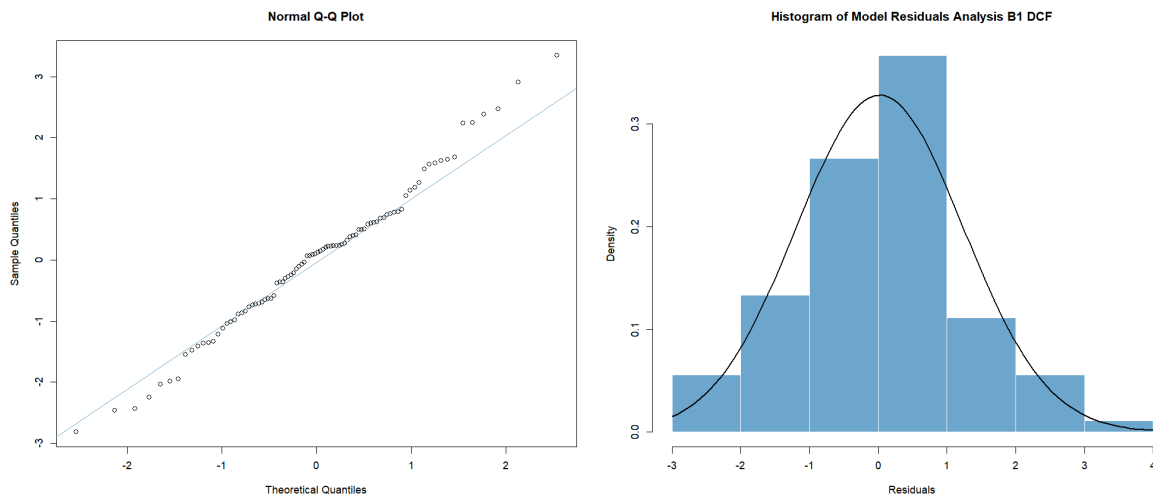

*Note.* Residuals from the model of Dual Task Cost tapping force with cognitive predictors showing a QQ-plot (left), and a histogram of residuals (right).

## Cognitive Predictors of Tapping Consistency for the Dual Task Cost

**Figure E6.** Q-Q Plot of Residuals of the model with cognitive predictors of tapping consistency for the dual task cost.

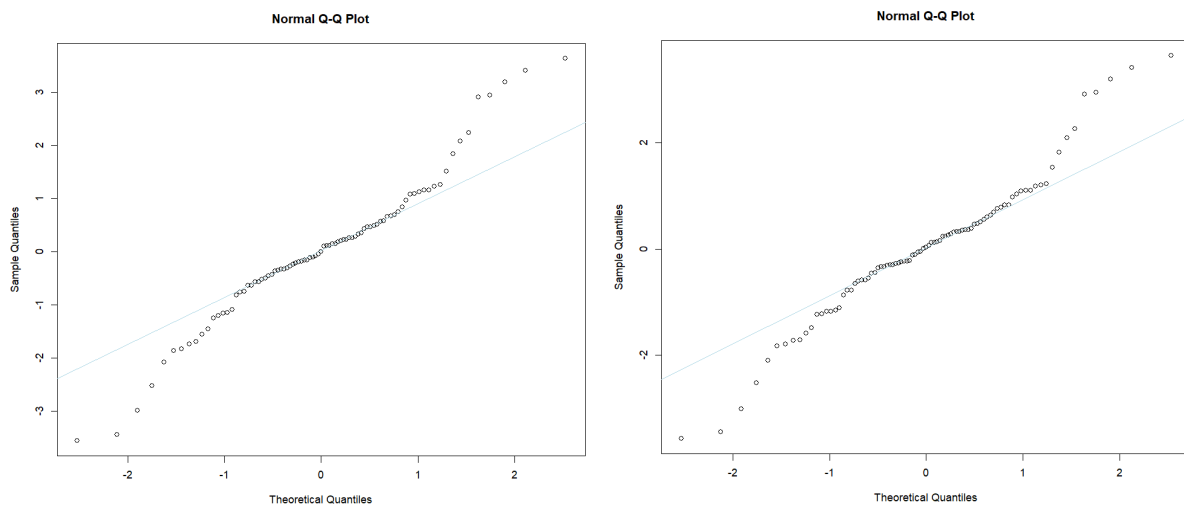

*Note.* QQ-plot of residuals from the model of Dual Task Cost tapping consistency with cognitive predictors, including extreme residuals (left), and with extreme residuals removed (right).

## Motor Predictors of Tapping Force for the Dual Task Cost

**Figure E7.** Q-Q Plot of Residuals of the model with motor predictors of tapping force for the dual task cost.

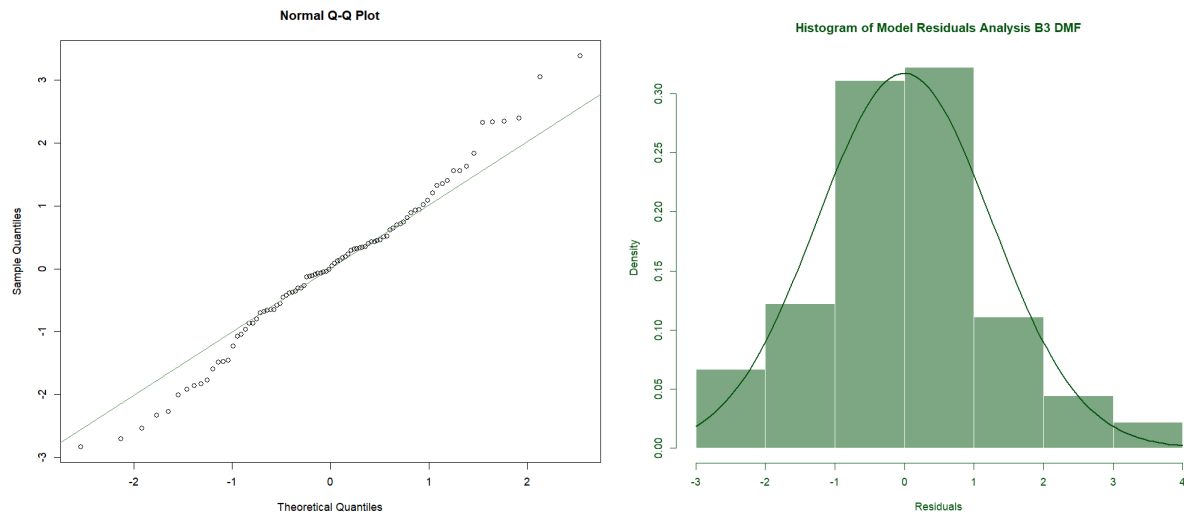

*Note.* Residuals from the model of Dual Task Cost tapping force with motor predictors showing a QQ-plot (left), and a histogram of residuals (right).

## Motor Predictors of Tapping Consistency for the Dual Task Cost

**Figure E15.** Q-Q Plot of Residuals of the model with Motor Predictors of tapping consistency for the dual task cost.

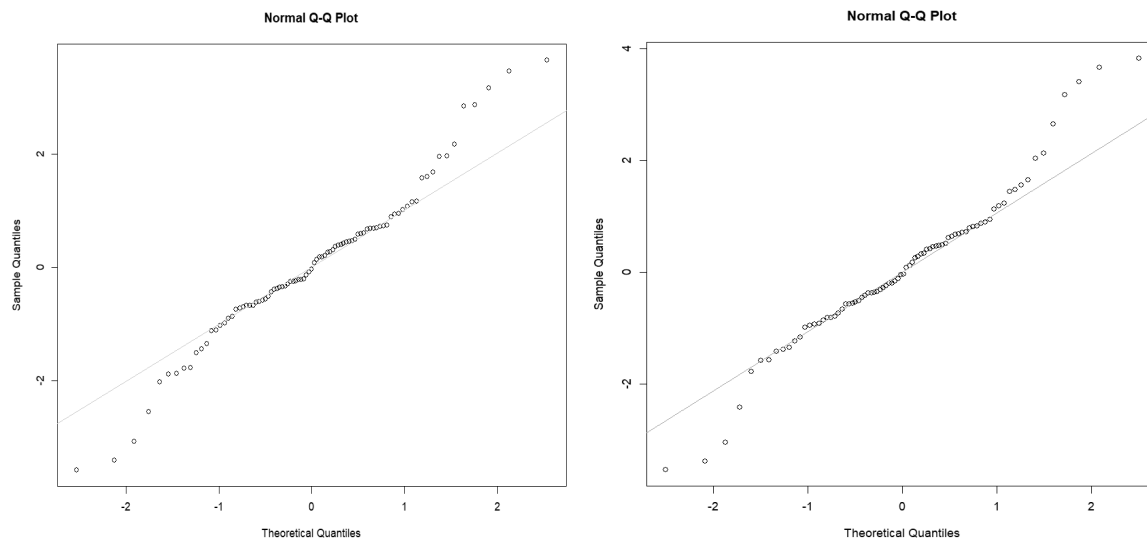

*Note.* QQ-plot of residuals from the model of Dual Task Cost of tapping consistency with motor predictors, including extreme residuals (left), and with extreme residuals removed (right).
